# Supplementary material
Source: publisher figshare collection journal article supplement (https://gsajournals.figshare.com/ndownloader/files/17598515)
Supplement: Supplementary file 1 [file 17598515]

## Sheet: Sheet1
WormBase ID	Common Name	Locus ID	RNAi clone(s) from original Ahringer Library (unless otherwise noted)	Comments
WBGene00000227	atm-1	Y48G1BL.2	I-7D20
WBGene00006820	unc-89	C09D1.1	I-1B22, I-1D10
WBGene00019362	cdk-2	K03E5.3	I-1D09
WBGene00022519		ZC123.4	I-1I09
WBGene00019698	riok-1	M01B12.5	I-1M12
WBGene00003400	dapk-1	K12C11.4	I-1O17
WBGene00020131	gcy-28	T01A4.1	I-2A03, I-9M17
WBGene00016421	cdc-7	C34G6.5	I-2B10
WBGene00002694	let-502	C10H11.9	I-2I07
WBGene00003472	mtk-1	B0414.7	I-2N09
WBGene00022631	nekl-2	ZC581.1	I-3A08
WBGene00022635		ZC581.9	I-3A22, I-3C02
WBGene00004186	prpf-4	F22D6.5	I-3B01
WBGene00010427	hpo-11	H37N21.1	I-3D01	Validated Positive
WBGene00017098		E02D9.1	I-3E24, I-3G16
WBGene00007258	hasp-1	C01H6.9	I-3F19
WBGene00000275	bub-1	R06C7.8	I-3H11
WBGene00020659		T21G5.1	I-3I08
WBGene00004879	smg-1	C48B6.6	I-3K02, I-3K04
WBGene00008311	rskn-2	C54G4.1	I-3N24
WBGene00002198	kin-14	F22D6.1	I-3O18
WBGene00000409	cdk-8	F39H11.3	I-4E16	Validated Positive (see also Underwood et al, 2018)
WBGene00001121	dyf-5	M04C9.5	I-4J21
WBGene00011352	rskn-1	T01H8.1	I-4O13
WBGene00003396	mom-4	F52F12.3	I-4P02
WBGene00003068	lrk-1	T27C10.6	I-5B19, I-5B21
WBGene00002205	kin-23	W04G5.6	I-5H20
WBGene00015230	tag-344	B0511.4	I-5I14
WBGene00013709	csnk-1	Y106G6E.6	I-5K03	Validated Positive
WBGene00007047	wts-1	T20F10.1	I-5K13
WBGene00000410	cdk-9	H25P06.2	I-5N09
WBGene00001746	gsk-3	Y18D10A.5	I-6D13
WBGene00001008	dlk-1	F33E2.2	I-6I22
WBGene00021214	hasp-2	Y18H1A.10	I-7D05
WBGene00021461	nekl-1	Y39G10AR.3	I-7J03
WBGene00002189	kin-1	ZK909.2	I-7K20
WBGene00003186	mek-2	Y54E10BL.6	I-7L14, I-7L20
WBGene00005078	src-2	F49B2.5	I-7M09
WBGene00021639		Y47G6A.13	I-7P05
WBGene00006868	vab-1	M03A1.1	II-3J20
WBGene00017895	vrk-1	F28B12.3	II-4B11
WBGene00016352	tbck-1	C33F10.2	II-4C09
WBGene00022780		ZK622.1	II-4E24
WBGene00006988	zyg-1	F59E12.2	II-4F04
WBGene00004860	sma-6	C32D5.2	II-4N13
WBGene00001538	gcy-12	F08B1.2	II-4G08
WBGene00004034	pkc-3	F09E5.1	II-4G10
WBGene00017137	pink-1	EEED8.9	II-4K04
WBGene00003822	nsy-1	F59A6.1	II-4M01
WBGene00015203	cdk-11.1	B0495.2	II-5D02	Validated Positive
WBGene00018301		F41G3.5	II-5O13
WBGene00002147	ire-1	C41C4.4	II-6A03
WBGene00002199	kin-15	M176.6	II-6B08
WBGene00011168		R09D1.12	II-6D14
WBGene00006938	wee-1.1	F35H8.7	II-6H22
WBGene00010681	mak-1	K08F8.1	II-6I14
WBGene00000289	cam-1	C01G6.8	II-6L11, II-6L21
WBGene00006940	wee-1.3	Y53C12A.1	II-6N16	False Positive
WBGene00003863	old-2	ZK938.5	II-7C01
WBGene00003862	old-1	C08H9.5	II-7C15
WBGene00012207		W02B12.12	II-7H10
WBGene00011304	mnk-1	R166.5	II-7I24
WBGene00000090	age-1	B0334.8	II-7J02, II-7J12
WBGene00007028	trr-1	C47D12.1	II-7N20
WBGene00014151	vps-15	ZK930.1	II-8E15, II-8G03
WBGene00003144	max-2	Y38F1A.10	II-8F19
WBGene00013591	gcn-2	Y81G3A.3	II-8H21
WBGene00009867		F49C5.4	II-8K22
WBGene00012586		Y38E10A.8	II-8M22
WBGene00012726		Y39G8B.5	II-8P18
WBGene00003931	pat-4	C29F9.7	III-1C19
WBGene00006894	ver-1	T17A3.1	III-1E09
WBGene00021022		W04B5.5	III-1H01
WBGene00001709	grk-2	W02B3.2	III-1O01
WBGene00016030	sel-15	C24A1.3	III-1O17	Validated Positive; named sel-15 in this study
WBGene00004183	prk-2	F45H7.4	III-1P19
WBGene00000767	coq-8	C35D10.4	III-2B21
WBGene00004762	sel-5	F35G12.3	III-2E08
WBGene00003401	mpk-1	F43C1.2	III-2I01, III-2I07
WBGene00007135	cdk-12	B0285.1	III-2K21, III-2K23	Validated Positive
WBGene00017033	nekl-4	D1044.8	III-2L12
WBGene00000900	daf-4	C05D2.1	III-2P04
WBGene00000518	ckk-1	C05H8.1	III-2P18, III-2P20
WBGene00001160	efk-1	F42A10.4	III-3A12	Validated Positive
WBGene00020106		R151.1	III-3H20	Previously R151.4. Merged to R151.1 since OL1.
WBGene00006971	zak-1	R13F6.6	III-3J03, III-3J05
WBGene00017950		F31E3.2	III-3N09
WBGene00015478		C05D10.2	III-3O07
WBGene00002201	kin-18	T17E9.1	III-3O13
WBGene00004042	plk-1	C14B9.4	III-4C10, III-4E08
WBGene00011299	ikke-1	R107.4	III-4J06
WBGene00022719	pdhk-2	ZK370.5	III-4N09
WBGene00019801	aak-1	PAR2.3	III-4P01
WBGene00014012	riok-3	ZK632.3	III-5C04
WBGene00013132	strd-1	Y52D3.1	III-5F16
WBGene00010838		M03C11.1	III-5F23, III-8P01
WBGene00008424		D2045.7	III-5J05
WBGene00006579	tlk-1	C07A9.3	III-5M13
WBGene00000405	cdk-1	T05G5.3	III-5O13
WBGene00006993	zyg-8	Y79H2A.11	III-6C10
WBGene00003048	lit-1	W06F12.1	III-6F20
WBGene00000407	cdk-5	T27E9.3	III-6P01
WBGene00006599	tpa-1	B0545.1	IV-1C03, IV-1C07
WBGene00000897	daf-1	F29C4.1	IV-1C09
WBGene00007007	mak-2	C44C8.6	IV-1G22
WBGene00000553	cmk-1	K07A9.2	IV-1H15
WBGene00021012	pig-1	W03G1.6	IV-1M15
WBGene00015994		C18H7.4	IV-1O17
WBGene00020003		R11E3.1	IV-2B01
WBGene00004044	plk-3	F55G1.8	IV-3B20
WBGene00006814	unc-82	B0496.3	IV-3P11, IV-3P13
WBGene00020289		T06C10.3	IV-4A13
WBGene00004056	pmk-2	F42G8.3	IV-4G23
WBGene00004057	pmk-3	F42G8.4	IV-4I01
WBGene00015650	pkg-2	C09G4.2	IV-4I06
WBGene00003961	pct-1	C07G1.3	IV-4K13
WBGene00006941	wnk-1	C46C2.1	IV-4P15	Validated Positive
WBGene00001487	frk-1	T04B2.2	IV-5A14
WBGene00006779	unc-43	K11E8.1	IV-5B01, IV-5O24
WBGene00012172		W01B6.5	IV-5C08
WBGene00003402	mpk-2	C04G6.1	IV-5E14
WBGene00012010		T25B9.4	IV-5N17
WBGene00007448		C08F8.6	IV-5P04
WBGene00010349	dyf-18	H01G02.2	IV-6E02
WBGene00002192	kin-4	C10C6.1	IV-6I17, IV-9N18
WBGene00006759	unc-22	ZK617.1	IV-6K06, IV-9N07
WBGene00003150	mbk-2	F49E11.1	IV-6N06
WBGene00013643		Y105C5A.24	IV-7H14
WBGene00004029	pik-1	K09B11.1	IV-7K03
WBGene00012638		Y38H8A.4	IV-7K23
WBGene00012792		Y43D4A.6	IV-8C03
WBGene00008711		F11E6.8	IV-8I16
WBGene00017083	kin-33	DC2.7	V-1E15
WBGene00019814		R02C2.1	V-1E17
WBGene00019815	kin-34	R02C2.2	V-1E19
WBGene00003374	mlk-1	K11D12.10	V-4E01
WBGene00006436	ttn-1	W06H8.8	V-4H23, V-4J01, V-4J05, V-4J13
WBGene00004740	scd-2	T10H9.2	V-4J10
WBGene00006437	mrck-1	K08B12.5	V-4L05
WBGene00022603	gck-2	ZC404.9	V-4P08
WBGene00000098	air-1	K07C11.2	V-5J24
WBGene00004395	rol-3	C16D9.2	V-5L18
WBGene00000226	atl-1	T06E4.3	V-6B02
WBGene00006443	pak-2	C45B11.1	V-7F15
WBGene00000102	akt-1	C12D8.10	V-7I17
WBGene00008410		D2023.6	V-8A05
WBGene00010096	rskd-1	F55C5.7	V-8A16
WBGene00004032	pkc-1	F57F5.5	V-8G03
WBGene00011283		R90.1	V-8H21
WBGene00012337		W07G4.3	V-8N17
WBGene00003916	par-1	H39E23.1	V-9E06, V-9E16	Validated Positive
WBGene00002211	kin-30	M01B2.1	V-10A11
WBGene00013355	gck-3	Y59A8B.23	V-11L10	Validated Positive
WBGene00012019	dkf-2	T25E12.4	V-11O03
WBGene00011612		T08D2.7	V-13E12
WBGene00000498	chk-1	Y39H10A.7	V-13G06, V-13G12
WBGene00003965	pdk-1	H42K12.1	X-1I14
WBGene00003007	lin-18	C16B8.1	X-2B07
WBGene00001994	hpk-1	F20B6.8	X-2F21, X-2F23
WBGene00015293		C01C4.3	X-2I24
WBGene00017472	cst-1	F14H12.4	X-2J23
WBGene00016038	cst-2	C24A8.4	X-2J23
WBGene00022613	sek-3	ZC449.3	X-2L20
WBGene00017381	ddr-2	F11D5.3	X-2O05
WBGene00018569		F47F2.1	X-2O06
WBGene00020504	svh-2	T14E8.1	X-3B23
WBGene00018034	sek-5	F35C8.1	X-3C19
WBGene00018035	sek-4	F35C8.2	X-3C21
WBGene00003911	pak-1	C09B8.7	X-3E04
WBGene00016104	ddr-1	C25F6.4	X-3G05
WBGene00003185	mek-1	K08A8.1	X-3L04
WBGene00018516	tag-257	F46G11.3	X-3M23
WBGene00002239	ksr-1	F13B9.5	X-4A10, X-4A12, X-4A16
WBGene00017039	trk-1	D1073.1	X-4D17, X-4D21
WBGene00004758	sek-1	R03G5.2	X-4E03
WBGene00001708	grk-1	F19C6.1	X-4N08
WBGene00003368	mkk-4	F42G10.2	X-4N20
WBGene00012162	sek-6	VZC374L.1	X-4N22
WBGene00004033	pkc-2	E01H11.1	X-4N23
WBGene00003970	pek-1	F46C3.1	X-5B11
WBGene00006896	ver-3	F59F3.1	X-5E14
WBGene00006897	ver-4	F59F3.5	X-5E20
WBGene00001184	egl-15	F58A3.2	X-5E24
WBGene00009793	pkn-1	F46F6.2	X-5G11
WBGene00013917	cdk-11.2	ZC504.3	X-5G19
WBGene00003247	mig-15	ZC504.4	X-5G21	Validated Positive
WBGene00000018	abl-1	M79.1	X-5K23
WBGene00008956	nekl-3	F19H6.1	X-5L22
WBGene00002991	lin-2	F17E5.1	X-5N10
WBGene00004719	sad-1	F15A2.6	X-6I02, X-6I04
WBGene00000406	cdk-4	F18H3.5	X-6I14
WBGene00003149	mbk-1	T04C10.1	X-6J16
WBGene00007287	gck-4	C04A11.3	X-6M22
WBGene00006517	madd-3	E02H4.3	X-6N05
WBGene00020142	aak-2	T01C8.1	X-7D05
WBGene00002203	kin-20	F46F2.2	X-7E11	Validated Positive
WBGene00010700	nipi-3	K09A9.1	X-7K15
WBGene00004980	spk-1	B0464.5	Vidal Library (two clones)
WBGene00002191	kin-3	B0205.7	Vidal Library	Validated positive (see also Wang et al, 2014)
WBGene00004055	pmk-1	B0218.3	Vidal Library
WBGene00000408	cdk-7	Y39G10AL.3	Vidal Library
WBGene00000099	air-2	B0207.4	Vidal Library
WBGene00002177	jkk-1	F35C8.3	Vidal Library
WBGene00002178	jnk-1	B0478.1	Vidal Library
WBGene00021753		Y50D7A.3	Vidal Library
WBGene00021745		Y50D4B.6	Vidal Library
WBGene00001173	egl-4	F55A8.2	Vidal Library (two clones)
WBGene00021315		Y32H12A.7	Vidal Library
WBGene00004789	sgk-1	W10G6.2	Vidal Library
WBGene00001526	gck-1	T19A5.2	This Work
WBGene00011339		T01G5.1	This Work
WBGene00000898	daf-2	Y55D5A.5	This Work
WBGene00002207	sid-3	B0302.1	This Work
WBGene00017277		F09C12.2	This Work
WBGene00004727	sax-1	R11G1.4	This Work
WBGene00004859	sma-5	W06B3.2	This Work
WBGene00012779	cdkl-1	Y42A5A.4	This Work
WBGene00000812	csk-1	Y48G1C.2	This Work
WBGene00003919	par-4	Y59A8B.14	This Work
WBGene00013869		ZC373.4	This Work
WBGene00002299	let-23	ZK1067.1	This Work
WBGene00013994		ZK524.4	This Work
WBGene00002202	kin-19	C03C10.1	This Work
WBGene00005077	src-1	Y92H12A.1	This Work
WBGene00013688	riok-2	Y105E8B.3	This Work
WBGene00011169		R09D1.13	This Work
WBGene00044388		C27D6.11	This Work
WBGene00019817		R02C2.6	This Work
WBGene00012270		W04G5.10	This Work
WBGene00003030	lin-45	Y73B6A.5	This Work
WBGene00015049		B0218.5	This Work
WBGene00004032	pkc-1	F57F5.5	This Work
WBGene00002200	kin-16	M176.7	This Work
WBGene00002213	kin-32	C30F8.4	This Work
WBGene00000103	akt-2	F28H6.1	This Work
WBGene00009326		F32D8.1	This Work
WBGene00077712	nipi-4	F40A3.5	This Work
WBGene00019911		R06A10.4	This Work
WBGene00012352	dkf-1	W09C5.5	This Work
WBGene00012929	rsks-1	Y47D3A.16	This Work
WBGene00006786	unc-51	Y60A3A.1	This Work
WBGene00000499	chk-2	Y60A3A.12	This Work
WBGene00004043	plk-2	Y71F9B.7	This Work
WBGene00000226	atl-1	T06E4.3	This Work
WBGene00002583	let-363	B0261.2	This Work
WBGene00021151		Y4C6A.1	IV-2H12, IV-2J02	Pseudogene
WBGene00020992		W03F8.2	IV-2P09	Pseudogene
WBGene00008487		F01D4.3	IV-5D23	Pseudogene
WBGene00017729		F22H10.5	X-7B11	Pseudogene
WBGene00021483		Y40A1A.1	This Work	Pseudogene
